# Supplementary material
Source: publisher figshare collection journal article supplement (https://rs.figshare.com/ndownloader/files/13476329)
Supplement: Supplementary file [file 13476329]

# Supporting information: Influence of correlated antigen presentation on T cell negative selection in the thymus

Soumya Banerjee<sup>1</sup> and S. Jonathan Chapman<sup>1</sup>

<sup>1</sup> Mathematical Institute, University of Oxford, Oxford, United Kingdom.

## S1 Appendix. Probability of negative selection.

When  $p = 2$ , the probability of negative selection in a single interaction is

$$\begin{aligned}
 P_1 &\sim \sum_{r=0}^{m/K} \left(1 - \frac{d}{m}\right)^{m/k-r} \left(\frac{d}{m}\right)^r \binom{m/K}{r} \left( \left(1 - \frac{rK}{m}\right)^s + \frac{sKr}{m} \left(1 - \frac{rK}{m}\right)^{s-1} \right) \\
 &\sim \sum_{r=0}^{m/K} \left(1 - \frac{d}{m}\right)^{m/k-r} \left(\frac{d}{m}\right)^r \binom{m/K}{r} \left(1 + \frac{sKr}{m}\right) e^{-rKs/m} \\
 &\sim \left(1 - \frac{d}{m} + \frac{de^{-sK/m}}{m}\right)^{m/K} \left(1 + \frac{s}{1 + (m/d - 1)e^{sK/m}}\right) \\
 &\sim \exp\left(-\frac{d}{K} + \frac{d}{K}e^{-sK/m}\right) \left(1 + \frac{sd}{m}e^{-sK/m}\right),
 \end{aligned}$$

giving Eq (8). For  $p = 3$  we have instead

$$\begin{aligned}
 P_1 &\sim \sum_{r=0}^{m/K} \left(1 - \frac{d}{m}\right)^{m/k-r} \left(\frac{d}{m}\right)^r \binom{m/K}{r} \\
 &\quad \times \left( \left(1 - \frac{rK}{m}\right)^s + \frac{sKr}{m} \left(1 - \frac{rK}{m}\right)^{s-1} + \frac{s(s-1)K^2r^2}{2m^2} \left(1 - \frac{rK}{m}\right)^{s-2} \right) \\
 &\sim \sum_{r=0}^{m/K} \left(1 - \frac{d}{m}\right)^{m/k-r} \left(\frac{d}{m}\right)^r \binom{m/K}{r} \left(1 + \frac{sKr}{m} + \frac{s(s-1)K^2r^2}{2m^2}\right) e^{-rKs/m} \\
 &\sim \left(1 - \frac{d}{m} + \frac{de^{-sK/m}}{m}\right)^{m/K} \\
 &\quad \times \left(1 + \frac{s}{1 + (m/d - 1)e^{sK/m}} + \frac{s(s-1)}{2} \frac{((K/d - K/m)e^{sK/m} + 1)}{(1 + (m/d - 1)e^{sK/m})^2}\right) \\
 &\sim \exp\left(-\frac{d}{K} + \frac{d}{K}e^{-sK/m}\right) \left(1 + \frac{sd}{m}e^{-sK/m} + \frac{s^2dK}{2m^2}e^{-sK/m} \left(1 + \frac{d}{K}e^{-sK/m}\right)\right),
 \end{aligned}$$

which is Eq (9).

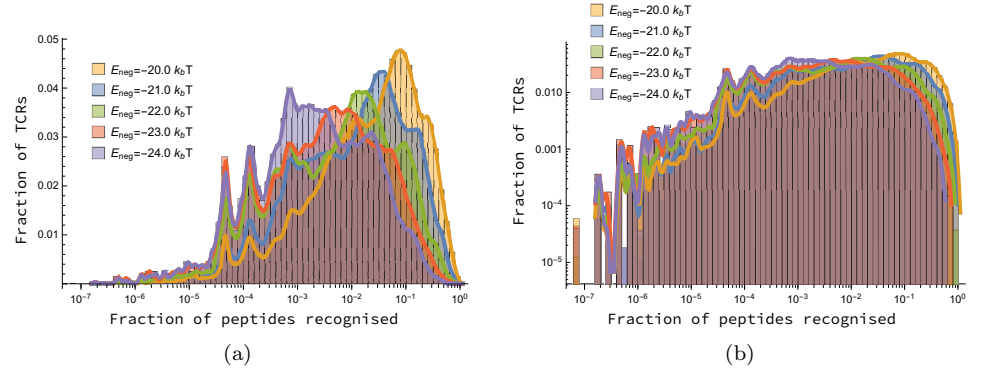

**S1 Fig.** Distribution of the proportion of peptides recognised by each of 200,000 randomly generated TCR sequences shown on (a) log-linear and (b) log-log scales for a variety of values of  $E_{\text{neg}}$ , with  $N = 5$ . The proportion of TCRs not recognising any peptides was approximately 6%, 12%, 19%, 31% and 44% for  $E_{\text{neg}} = -20.0k_bT$ ,  $-21.0k_bT$ ,  $-22.0k_bT$ ,  $-23.0k_bT$ , and  $-24.0k_bT$ , respectively.

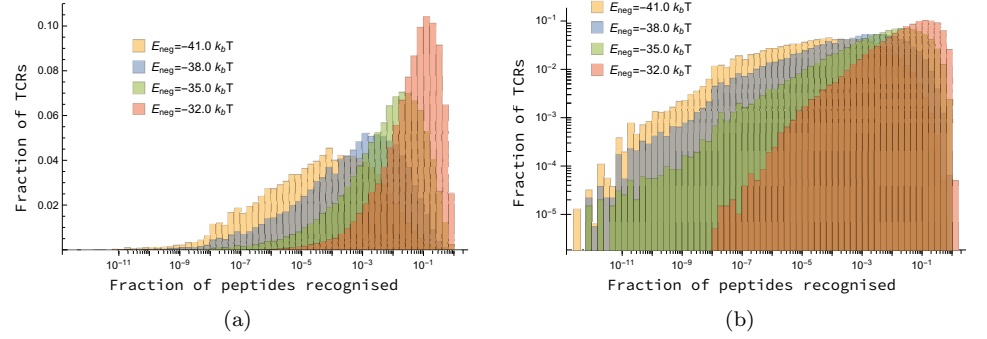

**S2 Fig.** Distribution of the proportion of peptides recognised by each of 200,000 randomly generated TCR sequences shown on (a) log-linear and (b) log-log scales for a variety of values of  $E_{\text{neg}}$ , with  $N = 9$ . The proportion of TCRs not recognising any peptides was approximately 0%, 0.4%, 4.4%, and 21% for  $E_{\text{neg}} = -32.0k_bT$ ,  $-35.0k_bT$ ,  $-38.0k_bT$ , and  $-41.0k_bT$ , respectively.

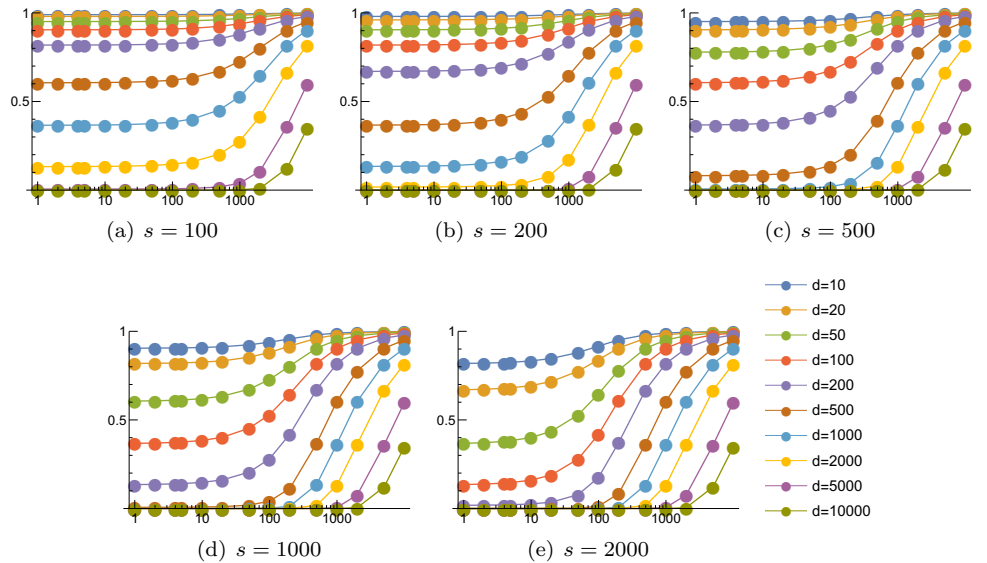

**S3 Fig.** Mean probability of escape in a single interaction,  $P_1$ , as a function of the number of mTEC classes,  $K$ , for various TCR degeneracies,  $d$ . Other model parameters are  $m = 100000$ ,  $p = 1$ .

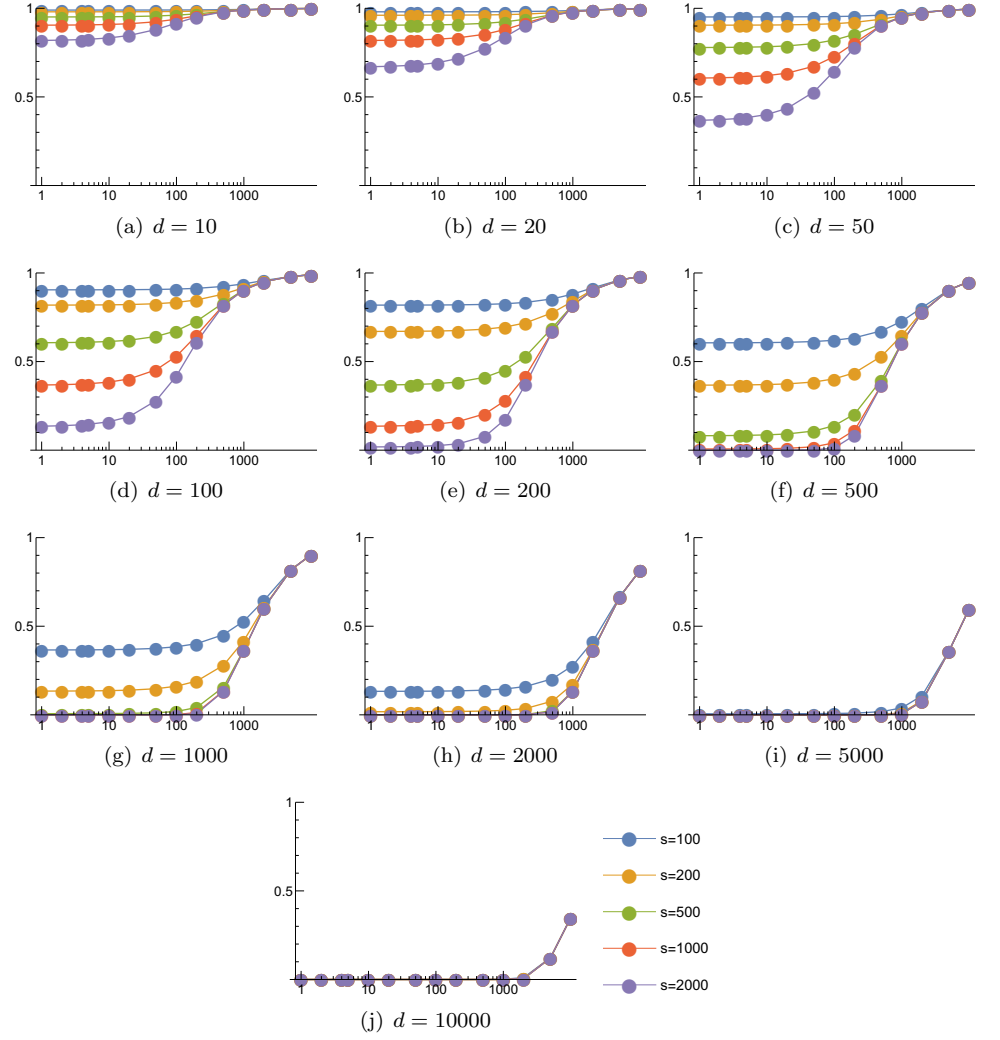

**S4 Fig.** Mean probability of escape in a single interaction,  $P_1$ , as a function of the number of mTEC classes,  $K$ , for various numbers of TCR-pMHC complexes in the immunological synapse,  $s$ . Other model parameters are  $m = 100000$ ,  $p = 1$ .

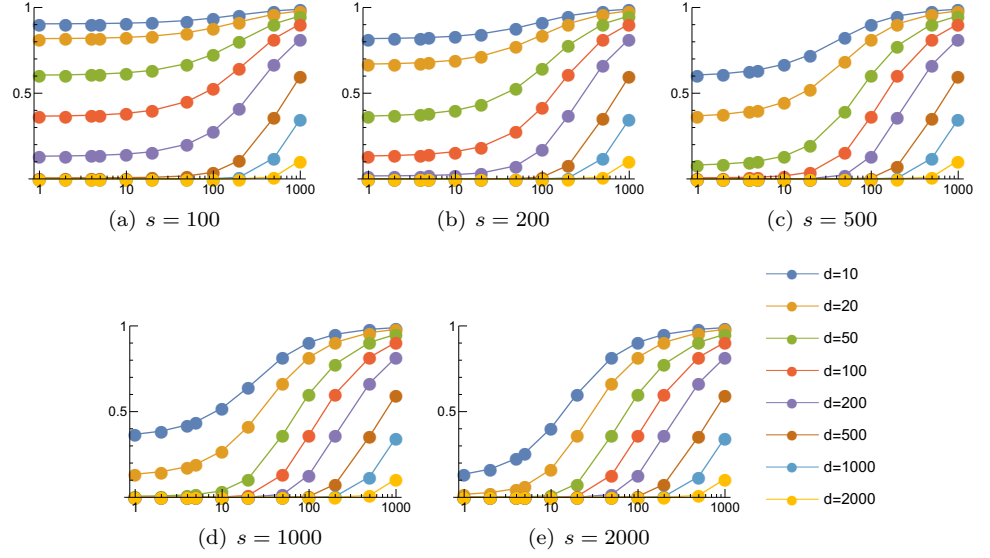

**S5 Fig.** Mean probability of escape in a single interaction,  $P_1$ , as a function of the number of mTEC classes,  $K$ , for various TCR degeneracies,  $d$ . Other model parameters are  $m = 10000$ ,  $p = 1$ .

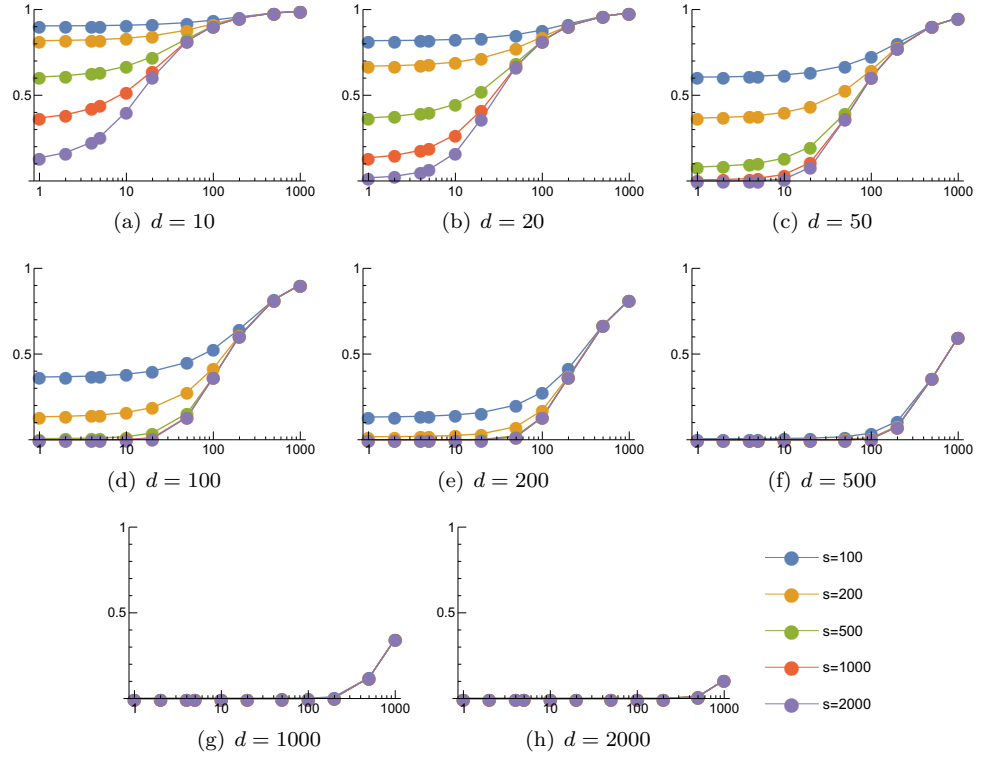

**S6 Fig.** Mean probability of escape in a single interaction,  $P_1$ , as a function of the number of mTEC classes,  $K$ , for various numbers of TCR-pMHC complexes in the immunological synapse,  $s$ . Other model parameters are  $m = 10000$ ,  $p = 1$ .

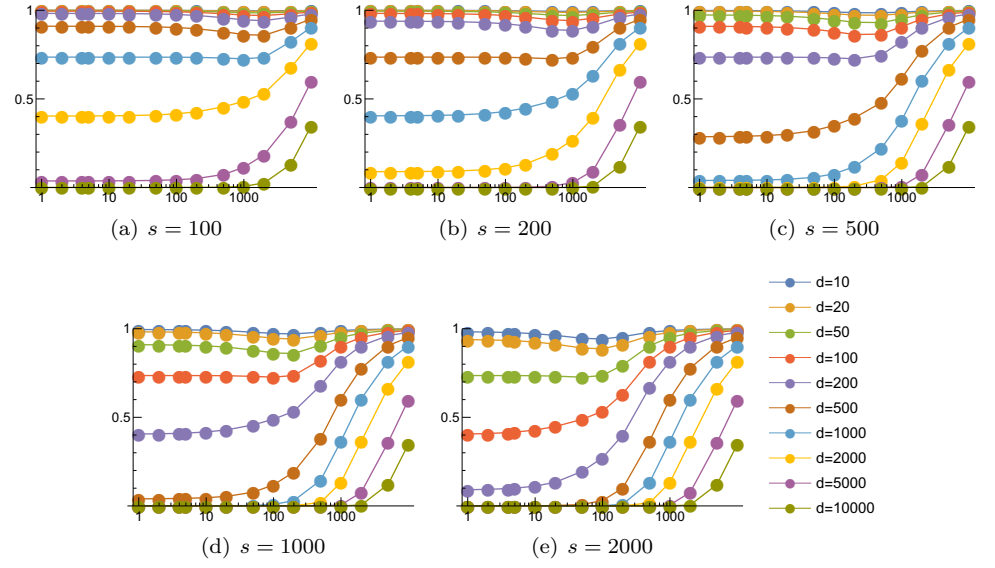

**S7 Fig.** Mean probability of escape in a single interaction,  $P_1$ , as a function of the number of mTEC classes,  $K$ , for various TCR degeneracies,  $d$ . Other model parameters are  $m = 100000$ ,  $p = 2$ .

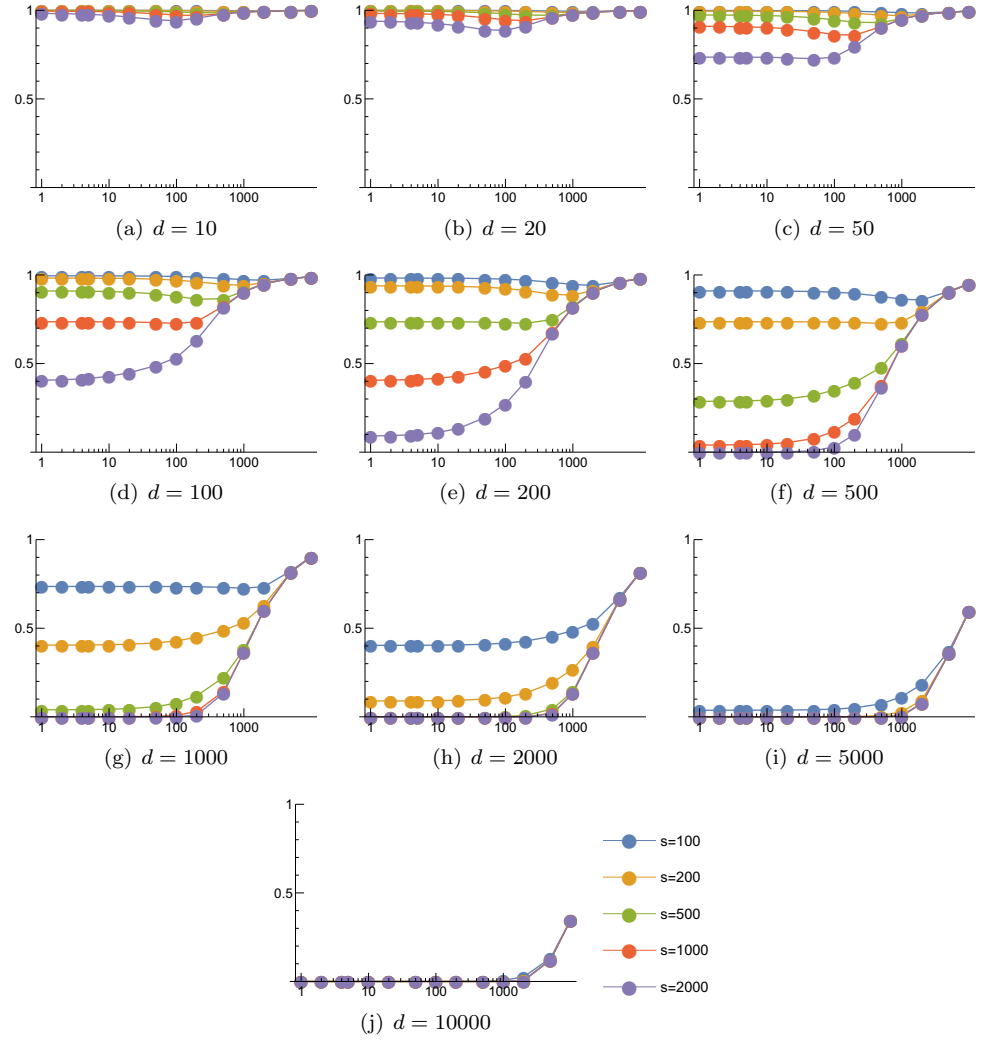

**S8 Fig.** Mean probability of escape in a single interaction,  $P_1$ , as a function of the number of mTEC classes,  $K$ , for various numbers of TCR-pMHC complexes in the immunological synapse,  $s$ . Other model parameters are  $m = 100000$ ,  $p = 2$ .

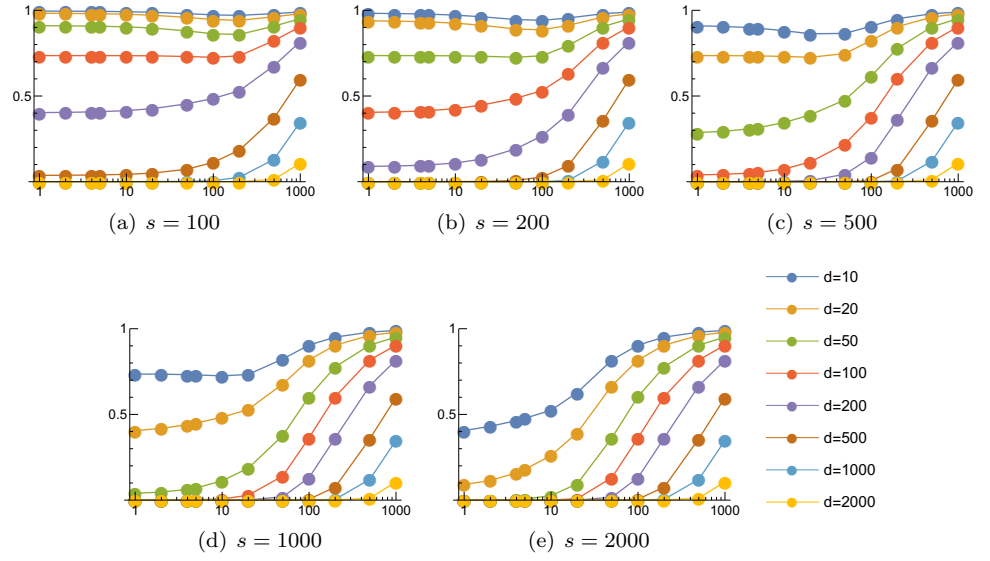

**S9 Fig.** Mean probability of escape in a single interaction,  $P_1$ , as a function of the number of mTEC classes,  $K$ , for various TCR degeneracies,  $d$ . Other model parameters are  $m = 10000$ ,  $p = 2$ .

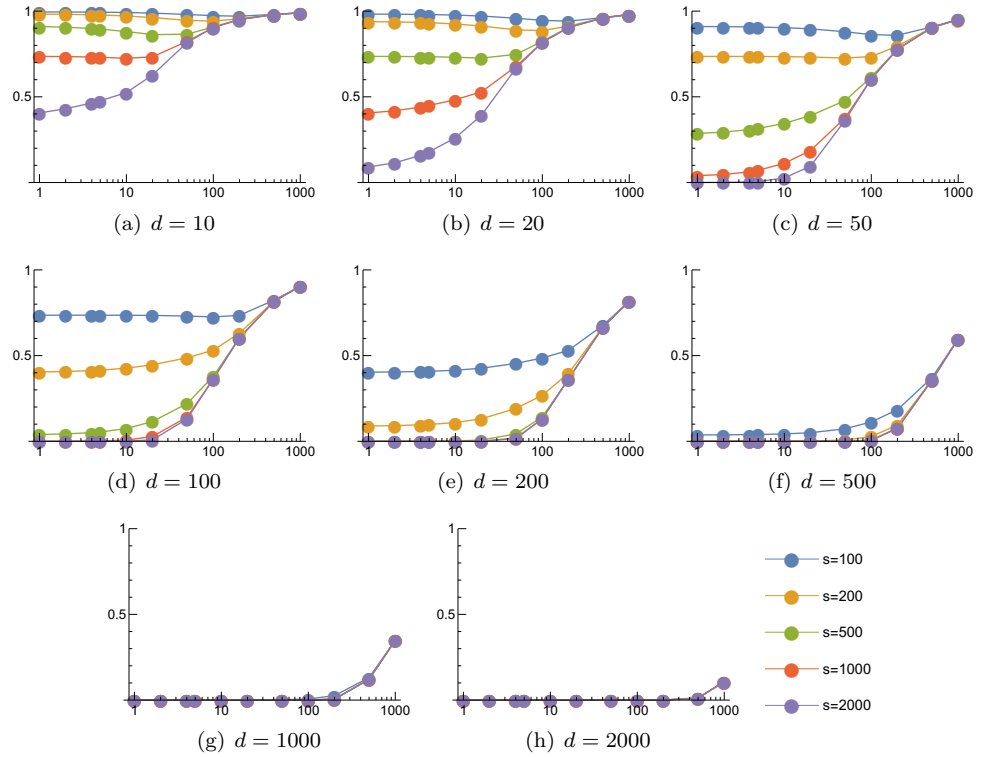

**S10 Fig.** Mean probability of escape in a single interaction,  $P_1$ , as a function of the number of mTEC classes,  $K$ , for various numbers of TCR-pMHC complexes in the immunological synapse,  $s$ . Other model parameters are  $m = 10000$ ,  $p = 2$ .

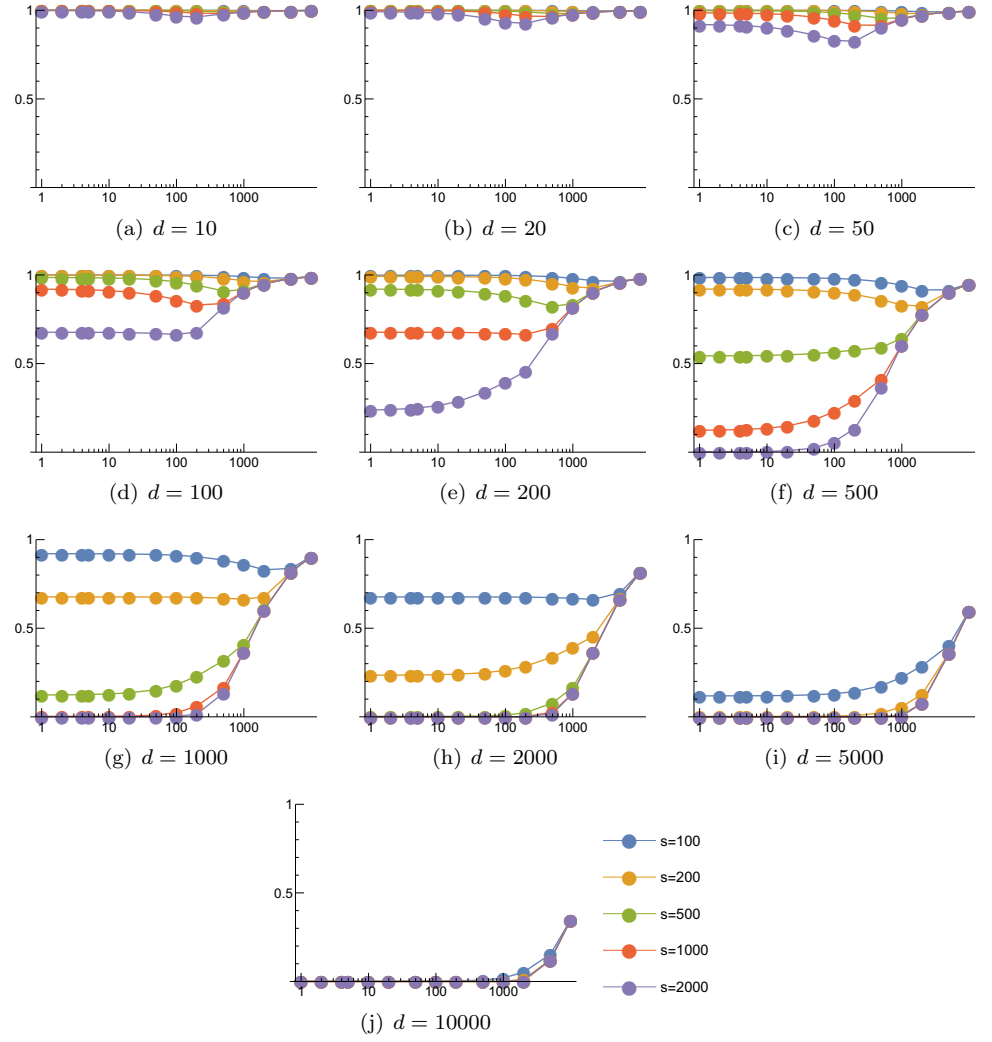

**S11 Fig.** Mean probability of escape in a single interaction,  $P_1$ , as a function of the number of mTEC classes,  $K$ , for various numbers of TCR-pMHC complexes in the immunological synapse,  $s$ . Other model parameters are  $m = 100000$ ,  $p = 3$ .



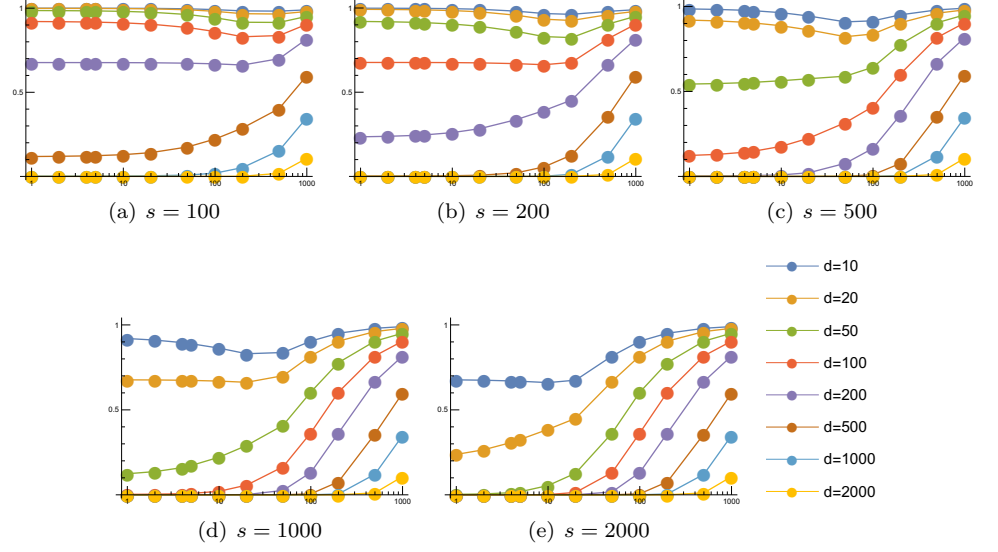

**S12 Fig.** Mean probability of escape in a single interaction,  $P_1$ , as a function of the number of mTEC classes,  $K$ , for various TCR degeneracies,  $d$ . Other model parameters are  $m = 10000$ ,  $p = 3$ .

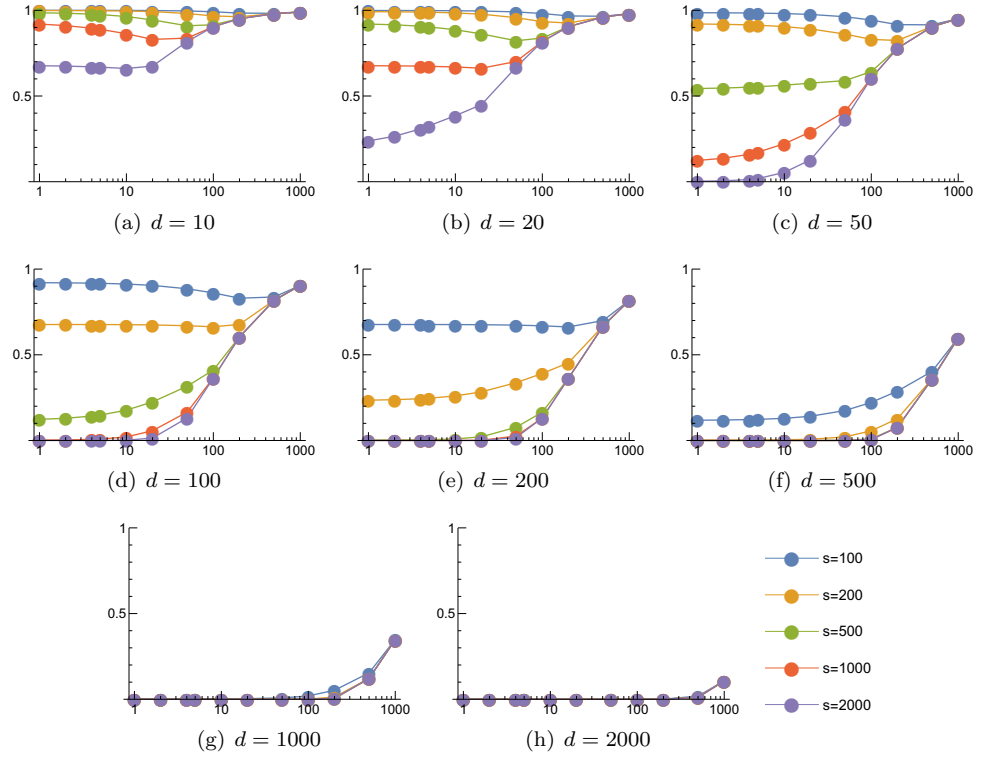

**S13 Fig.** Mean probability of escape in a single interaction,  $P_1$ , as a function of the number of mTEC classes,  $K$ , for various numbers of TCR-pMHC complexes in the immunological synapse,  $s$ . Other model parameters are  $m = 10000$ ,  $p = 3$ .

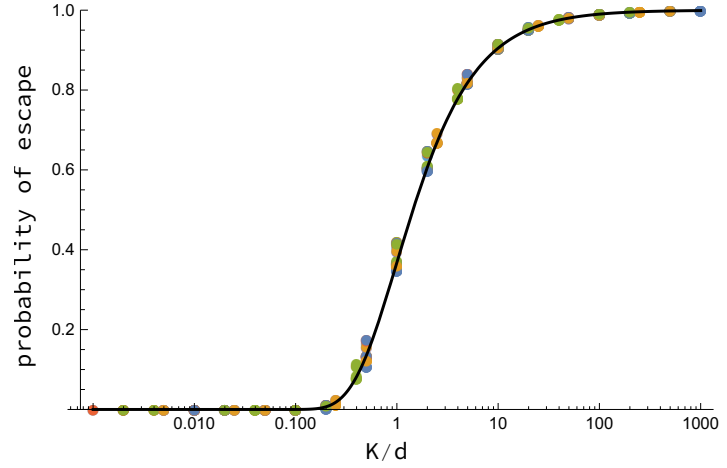

**S14 Fig.** The mean probability of escape as a function of  $K/d$ , illustrating the collapse of the data when  $s > 2m/K$ . The curve is given by Eq (6). The points are calculated using all those combinations of  $s = 100, 200, 500, 1000, 2000$ ,  $K = 1, 2, 4, 5, 10, 20, 50, 100, 200, 500, 1000$ ,  $m = 10^4, 10^5$ , and  $d = 1, 2, 5, 10, 20, 50, 100, 200, 500, 1000, 2000, 5000, 10000, 20000, 50000, 100000$ , which satisfy the constraint  $s > 2m/K$  (and  $d \leq m$ ). The plot shows data for  $p = 1$ . For  $p = 2$  the requirement is more like  $s > 3.5m/K$ ; for  $p = 2$  the requirement is  $s > 5m/K$ .

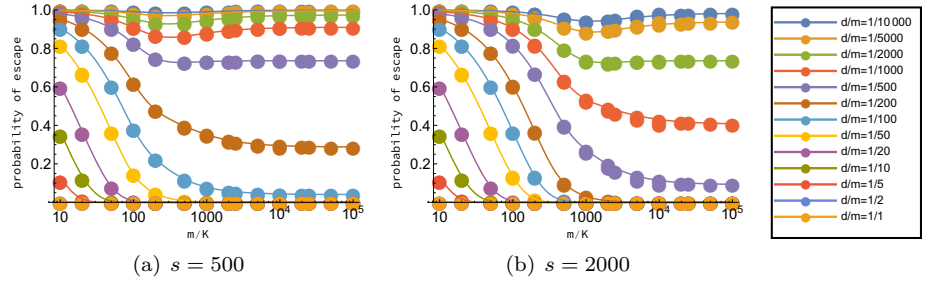

**S15 Fig.** The mean probability of escape as a function of  $m/K$ . The curves are given by Eq (8). The points are calculated values, using both  $m = 10^4$  and  $10^5$ . For  $s = 500$  these points lie on top of one another. For  $s = 2000$  the difference between the two sets of points is just visible near  $m/K = 10^4$ . Here  $p = 2$ .
